# Supplementary material
Source: publisher figshare collection journal article supplement (https://acs.figshare.com/ndownloader/files/5727549)
Supplement: Supplementary file 1 [file 5727549]

Ms No. JA0167304-24-251

Corresponding Author: Shoushan Fan

**Supporting Information:** The Raman spectra have 3 features below 2000  $\text{cm}^{-1}$ , the disorder induced D band, the graphite like G band related to the E<sub>2g2</sub> graphite mode, and the D' band which is also disorder induced and related to the maximum of the graphite 2D phonon density of states<sup>1</sup> (Fig. 1). Normally, the G band can be decomposed into two close modes for the vibrations along the nanotubes axis and in circumferential direction, but here we will consider it as only one band since we have not been able to observe this decomposition clearly. At higher frequencies than 2000  $\text{cm}^{-1}$ , overtones of these bands are seen. 2×D, D+G and 2×G are the overtones of D/D, D/G and G/G modes respectively. Raman modes of <sup>13</sup>C nanotubes ( $\omega_{13\text{C}}$ ) exhibited clear shifts to lower frequencies compared to those of <sup>12</sup>C nanotubes ( $\omega_{12\text{C}}$ ), with a uniform ratio of  $\omega_{13\text{C}} : \omega_{12\text{C}} \sim 0.96$  (for the details see table 1).

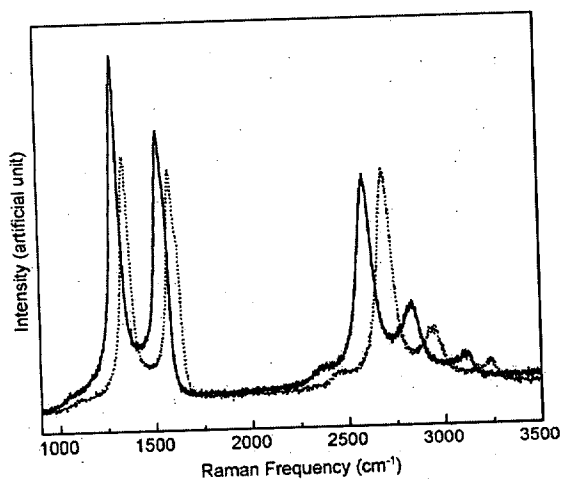

Figure 1 Raman spectra of pure <sup>13</sup>C nanotube array (solid) and pure <sup>12</sup>C nanotube array (dotted).

Table 1. Experimentally measured Raman modes of pure <sup>12</sup>C and pure <sup>13</sup>C multi-walled carbon nanotube arrays.

| Raman modes <sup>a</sup>                                | D     | G     | D'    | <sup>a</sup> | 2×D   | D+G   | 2×G   |
|---------------------------------------------------------|-------|-------|-------|--------------|-------|-------|-------|
| <sup>13</sup> C MWNT ( $\text{cm}^{-1}$ )               | 1298  | 1526  | 1558  | 2345         | 2590  | 2833  | 3099  |
| <sup>12</sup> C MWNT ( $\text{cm}^{-1}$ )               | 1350  | 1585  | 1620  | 2452         | 2700  | 2947  | 3232  |
| Ratio of <sup>13</sup> C / <sup>12</sup> C <sup>b</sup> | 0.961 | 0.963 | 0.962 | 0.956        | 0.959 | 0.961 | 0.959 |

<sup>a</sup> This band has no explicit name in the graphitic Raman spectrum.

<sup>b</sup> The ratio of the Raman frequencies of <sup>13</sup>C nanotubes over the corresponding frequencies of <sup>12</sup>C nanotubes.

- (1) Ekhard, P. C.; Holden, J. M.; Jishi, R. A.; *Carbon* 1995, 33, 959.  
 (2) Rao, A. M.; Jorio, A.; Pimenta, M. A.; Dantas, M. S. S.; Saito, R.; Dresselhaus, G.; Dresselhaus, M. S. *Phys. Rev. Lett.* 2000, 84, 1820.
